# Supplementary material
Source: publisher site journal article supplement (https://www.dovepress.com/article/361169)
Supplement: Supplementary file 1 [file get_supplementary_file.php]

## Supplementary materials

**Table S1: Biomarkers and discriminative taxa amongst the studied groups**

| Biomarkers                                                                                                       | Group            | P value  | FDR      |
|------------------------------------------------------------------------------------------------------------------|------------------|----------|----------|
| Bacteria.Firmicutes.Erysipelotrichi.Erysipelotrichales.Erysipelotrichaceae._Eubacterium_.s__cylindroides         | Assuit Control   | 0.028315 | 4.201802 |
| Bacteria.Firmicutes.Erysipelotrichi.Erysipelotrichales.Erysipelotrichaceae.Clostridium                           | Assuit Control   | 0.041957 | 3.746634 |
| Bacteria.Firmicutes.Erysipelotrichi.Erysipelotrichales.Erysipelotrichaceae._Eubacterium_                         | Assuit Control   | 0.014007 | 4.210247 |
| Bacteria.Firmicutes.Erysipelotrichi.Erysipelotrichales.Erysipelotrichaceae.Clostridium.s__saccharogumia          | Assuit Control   | 0.041957 | 3.746634 |
| Bacteria.Tenericutes.Mollicutes.Anaeroplasmatales.Anaeroplasmataceae.s__                                         | Assuit Control   | 0.006215 | 4.947985 |
| Bacteria.Tenericutes.Mollicutes.Anaeroplasmatales                                                                | Assuit Control   | 0.006215 | 4.947985 |
| Bacteria.Tenericutes.Mollicutes.Anaeroplasmatales.Anaeroplasmataceae                                             | Assuit Control   | 0.006215 | 4.947985 |
| Bacteria.Tenericutes.Mollicutes.Anaeroplasmatales.Anaeroplasmataceae                                             | Assuit Control   | 0.006215 | 4.947985 |
| Bacteria.Proteobacteria.Alphaproteobacteria                                                                      | Assuit Control   | 0.002425 | 5.293802 |
| Bacteria.Proteobacteria.Epsilonproteobacteria.Campylobacteriales.Campylobacteraceae.Campylobacter.s__ureolyticus | Assuit Control   | 0.02797  | 3.341706 |
| Bacteria.Proteobacteria.Alphaproteobacteria.RF32                                                                 | Assuit Control   | 0.006004 | 5.05032  |
| Bacteria.Proteobacteria.Alphaproteobacteria                                                                      | Assuit Control   | 0.000621 | 4.916827 |
| Bacteria.Proteobacteria.Alphaproteobacteria.RF32                                                                 | Assuit Control   | 0.006004 | 5.05032  |
| Bacteria.Proteobacteria.Alphaproteobacteria                                                                      | Assuit Control   | 0.000621 | 4.916827 |
| Bacteria.Proteobacteria.Alphaproteobacteria                                                                      | Assuit Control   | 0.000621 | 4.916827 |
| Bacteria.Proteobacteria.Alphaproteobacteria.RF32                                                                 | Assuit Control   | 0.006004 | 5.05032  |
| Bacteria.Lentisphaerae._Lentisphaeria_.Victivallales.Victivallaceae                                              | Assuit DM        | 0.049218 | 4.589315 |
| Bacteria.Lentisphaerae._Lentisphaeria_.Victivallales                                                             | Assuit DM        | 0.049218 | 4.589315 |
| Bacteria.Lentisphaerae._Lentisphaeria_.Victivallales.Victivallaceae.Victivallis.s__vadensis                      | Assuit DM        | 0.049218 | 4.588397 |
| Bacteria.Lentisphaerae._Lentisphaeria_.Victivallales.Victivallaceae.Victivallis                                  | Assuit DM        | 0.049218 | 4.588397 |
| Bacteria.Firmicutes.Erysipelotrichi.Erysipelotrichales                                                           | Assuit DM        | 0.013688 | 4.610511 |
| Bacteria.Firmicutes.Erysipelotrichi.Erysipelotrichales.Erysipelotrichaceae                                       | Assuit DM        | 0.013688 | 4.610511 |
| Bacteria.Firmicutes.Erysipelotrichi.Erysipelotrichales.Erysipelotrichaceae.p_75_a5                               | Assuit DM        | 0.032316 | 3.898052 |
| Bacteria.Firmicutes.Erysipelotrichi                                                                              | Assuit DM        | 0.013688 | 4.610511 |
| Bacteria.Firmicutes.Bacilli.Lactobacillales.Lactobacillaceae                                                     | Assuit DM        | 0.047891 | 4.16816  |
| Bacteria.Firmicutes.Clostridia.Clostridiales.Ruminococcaceae.Ruminococcus.s__callidus                            | Assuit DM        | 0.00964  | 3.161132 |
| Bacteria._Thermi_.Deinococci.Thermales.Thermaceae                                                                | Assuit DM        | 0.0023   | 4.45731  |
| Bacteria._Thermi_.Deinococci.Thermales                                                                           | Assuit DM        | 0.0023   | 4.45731  |
| Bacteria._Thermi_.Deinococci.Thermales.Thermaceae.Meiothermus.s__                                                | Assuit DM        | 0.000882 | 4.45731  |
| Bacteria._Thermi_.Deinococci.Thermales.Thermaceae.Meiothermus                                                    | Assuit DM        | 0.000882 | 4.45731  |
| Bacteria._Thermi_.Deinococci                                                                                     | Assuit DM        | 0.003523 | 4.45731  |
| Bacteria.Actinobacteria.Coriobacteriia.Coriobacteriales.Coriobacteriaceae.Eggerthella.s__                        | Assuit DM        | 0.030212 | 4.275898 |
| Bacteria.Actinobacteria.Actinobacteria.Bifidobacteriales.Bifidobacteriaceae.Bifidobacterium.s__bifidum           | Assuit DM        | 0.011101 | 4.823824 |
| Bacteria.Actinobacteria.Coriobacteriia.Coriobacteriales.Coriobacteriaceae.Eggerthella                            | Assuit DM        | 0.031757 | 4.275898 |
| Bacteria.Actinobacteria.Coriobacteriia.Coriobacteriales.Coriobacteriaceae.Collinsella                            | Assuit DM        | 0.016269 | 3.223242 |
| Bacteria.Bacteroidetes.Bacteroidia.Bacteroidales.Rikenellaceae.Alistipes                                         | Assuit DM        | 0.043782 | 3.927298 |
| Bacteria.Bacteroidetes.Bacteroidia.Bacteroidales.Rikenellaceae.Alistipes.s__indistinctus                         | Assuit DM        | 0.035004 | 3.918124 |
| Bacteria.Firmicutes.Clostridia.Clostridiales.                                                                    | Ismailia Control | 0.006324 |          |

|                                                                                                             |                  |          |          |
|-------------------------------------------------------------------------------------------------------------|------------------|----------|----------|
| Bacteria.Firmicutes.Clostridia.Clostridiales                                                                | Ismailia Control | 0.006324 |          |
| Bacteria.Firmicutes.Clostridia.Clostridiales.Ruminococcaceae.Faecalibacterium.s__prausnitzii                | Ismailia Control | 0.006324 | 3.200659 |
| Bacteria.Firmicutes.Clostridia.Clostridiales.Ruminococcaceae                                                | Ismailia Control | 0.006324 | 3.316053 |
| Bacteria.Firmicutes.Clostridia.Clostridiales.Ruminococcaceae.Faecalibacterium                               | Ismailia Control | 0.009466 | 3.807804 |
| Bacteria.Firmicutes.Clostridia.Clostridiales.Clostridiaceae.Clostridium.s__perfringens                      | Ismailia Control | 0.006324 | 3.316053 |
| Bacteria.Firmicutes.Clostridia.Clostridiales.Clostridiaceae.SMB53.s__                                       | Ismailia Control | 0.006324 | 3.316053 |
| Bacteria.Firmicutes.Clostridia.Clostridiales.Veillonellaceae.Veillonella.s__parvula                         | Ismailia Control | 0.006324 | 3.316053 |
| Bacteria.Firmicutes.Clostridia.Clostridiales.Veillonellaceae.Veillonella                                    | Ismailia Control | 0.000157 | 3.703247 |
| Bacteria.Firmicutes.Clostridia.Clostridiales.Veillonellaceae.Veillonella.s__dispar                          | Ismailia Control | 0.006324 | 3.200659 |
| Bacteria.Firmicutes.Clostridia.Clostridiales.Veillonellaceae                                                | Ismailia Control | 0.006324 | 3.200659 |
| Bacteria.Firmicutes.Clostridia.Clostridiales.Veillonellaceae.Phascolarctobacterium.s__                      | Ismailia Control | 0.006324 | 3.200659 |
| Bacteria.Firmicutes.Clostridia.Clostridiales.Veillonellaceae.Phascolarctobacterium                          | Ismailia Control | 0.006324 | 3.200659 |
| Bacteria.Firmicutes.Clostridia.Clostridiales.Veillonellaceae.Mitsuokella                                    | Ismailia Control | 0.01393  | 5.340812 |
| Bacteria.Firmicutes.Clostridia.Clostridiales.Veillonellaceae.Mitsuokella.s__multacida                       | Ismailia Control | 0.00564  | 5.340812 |
| Bacteria.Firmicutes.Clostridia.Clostridiales.Lachnospiraceae                                                | Ismailia Control | 0.006324 | 3.200659 |
| Bacteria.Firmicutes.Clostridia.Clostridiales.Lachnospiraceae._Ruminococcus.s__torques                       | Ismailia Control | 0.006324 | 2.842543 |
| Bacteria.Firmicutes.Clostridia.Clostridiales.Lachnospiraceae.Dorea.s__                                      | Ismailia Control | 0.006324 | 3.617083 |
| Bacteria.Firmicutes.Clostridia.Clostridiales.Lachnospiraceae.s__                                            | Ismailia Control | 0.006324 | 3.316053 |
| Bacteria.Firmicutes.Clostridia.Clostridiales.Peptostreptococcaceae.Clostridium.s__maritimum                 | Ismailia Control | 0.027833 | 3.563207 |
| Bacteria.Firmicutes.Clostridia.Clostridiales.Peptostreptococcaceae.Peptostreptococcus                       | Ismailia Control | 0.044417 | 3.904638 |
| Bacteria.Firmicutes.Clostridia.Clostridiales.Peptostreptococcaceae.Peptostreptococcus.s__anaerobius         | Ismailia Control | 0.029675 | 3.904638 |
| Bacteria.Firmicutes.Clostridia.Clostridiales.Peptostreptococcaceae                                          | Ismailia Control | 0.006324 | 3.316053 |
| Bacteria.Firmicutes.Clostridia.Clostridiales.Peptostreptococcaceae.s__                                      | Ismailia Control | 0.006324 | 3.316053 |
| Bacteria.Firmicutes.Bacilli.Bacillales.Staphylococcaceae.Staphylococcus.s__                                 | Ismailia Control | 1.34E-05 | 3.618892 |
| Bacteria.Firmicutes.Bacilli.Bacillales.Staphylococcaceae.Staphylococcus                                     | Ismailia Control | 0.04052  | 3.618892 |
| Bacteria.Firmicutes.Bacilli.Bacillales.Bacillaceae.Geobacillus.s__                                          | Ismailia Control | 0.006324 | 3.200659 |
| Bacteria.Firmicutes.Bacilli.Lactobacillales.Lactobacillaceae.Lactobacillus.s__                              | Ismailia Control | 0.006324 | 3.143573 |
| Bacteria.Firmicutes.Bacilli.Lactobacillales.Lactobacillaceae.Lactobacillus.s__reuteri                       | Ismailia Control | 0.006324 | 3.200659 |
| Bacteria.Firmicutes.Bacilli.Lactobacillales.Lactobacillaceae.Lactobacillus.s__iners                         | Ismailia Control | 0.000529 | 3.75801  |
| Bacteria.Firmicutes.Bacilli.Lactobacillales.Streptococcaceae.Streptococcus.s__minor                         | Ismailia Control | 0.006324 | 3.200659 |
| Bacteria.Firmicutes.Bacilli.Bacillales                                                                      | Ismailia Control | 0.021884 | 3.892972 |
| Bacteria.Firmicutes.Bacilli.Bacillales.Planococcaceae                                                       | Ismailia Control | 0.006324 | 3.316053 |
| Bacteria.Firmicutes.Clostridia.Clostridiales._Tissierellaceae_Peptoniphilus.s__                             | Ismailia Control | 1.34E-05 | 3.53935  |
| Bacteria.Firmicutes.Clostridia.Clostridiales._Tissierellaceae_Peptoniphilus                                 | Ismailia Control | 1.34E-05 | 3.53935  |
| Bacteria.Firmicutes.Clostridia.Clostridiales._Tissierellaceae_                                              | Ismailia Control | 0.025491 | 3.853526 |
| Bacteria.Actinobacteria.Actinobacteria.Actinomycetales.Propionibacteriaceae.Propionibacterium.s__granulosum | Ismailia Control | 0.006324 | 3.316053 |
| Bacteria.Actinobacteria.Actinobacteria.Actinomycetales.Micrococcaceae.Arthrobacter.s__                      | Ismailia Control | 0.006324 | 3.316053 |
| Bacteria.Actinobacteria.Actinobacteria.Actinomycetales.Micrococcaceae.Arthrobacter                          | Ismailia Control | 0.006324 | 3.316053 |
| Bacteria.Actinobacteria.Actinobacteria.Actinomycetales.Actinomycetaceae.Mobiluncus.s__                      | Ismailia Control | 0.006324 | 3.316053 |
| Bacteria.Actinobacteria.Thermoleophila                                                                      | Ismailia Control | 0.006324 | 3.316053 |
| Bacteria.Actinobacteria.Thermoleophila.Gaiellales                                                           | Ismailia Control | 0.006324 | 3.316053 |

|                                                                                                          |                  |          |          |
|----------------------------------------------------------------------------------------------------------|------------------|----------|----------|
| Bacteria.Actinobacteria.Thermoleophilia.Gaiellales                                                       | Ismailia Control | 0.006324 | 3.316053 |
| Bacteria.Actinobacteria.Thermoleophilia.Gaiellales                                                       | Ismailia Control | 0.006324 | 3.316053 |
| Bacteria.Actinobacteria.Actinobacteria.Actinomycetales.Brevibacteriaceae.Brevibacterium                  | Ismailia Control | 0.006324 | 3.316053 |
| Bacteria.Actinobacteria.Actinobacteria.Actinomycetales.Brevibacteriaceae.Brevibacterium.s__              | Ismailia Control | 0.006324 | 3.316053 |
| Bacteria.Actinobacteria.Actinobacteria.Actinomycetales.Brevibacteriaceae                                 | Ismailia Control | 0.006324 | 3.316053 |
| Bacteria.Actinobacteria.Actinobacteria.Actinomycetales.Micrococcaceae.Rothia.s__dentocariosa             | Ismailia Control | 0.006324 | 3.200659 |
| Bacteria.Actinobacteria.Actinobacteria.Actinomycetales.Corynebacteriaceae.Corynebacterium.s__            | Ismailia Control | 0.006324 | 3.316053 |
| Bacteria.Actinobacteria.Actinobacteria.Actinomycetales.Propionibacteriaceae.Propionibacterium            | Ismailia Control | 1.34E-05 | 3.441897 |
| Bacteria.Actinobacteria.Actinobacteria.Actinomycetales.Propionibacteriaceae                              | Ismailia Control | 0.010733 | 3.441897 |
| Bacteria.Actinobacteria.Coriobacteriia.Coriobacteriales.Coriobacteriaceae                                | Ismailia Control | 0.006324 | 3.143573 |
| Bacteria.Actinobacteria.Actinobacteria.Actinomycetales.Actinomycetaceae.Mobiluncus                       | Ismailia Control | 0.006324 | 3.316053 |
| Bacteria.Proteobacteria.Betaproteobacteria.Rhodocyclales.Rhodocyclaceae                                  | Ismailia Control | 0.006324 | 3.316053 |
| Bacteria.Proteobacteria.Betaproteobacteria.Rhodocyclales.Rhodocyclaceae.Zoogloea.s__                     | Ismailia Control | 0.006324 | 3.316053 |
| Bacteria.Proteobacteria.Betaproteobacteria.Burkholderiales.Oxalobacteraceae                              | Ismailia Control | 0.006324 | 3.200659 |
| Bacteria.Proteobacteria.Betaproteobacteria.Burkholderiales.Oxalobacteraceae.s__                          | Ismailia Control | 0.006324 | 3.200659 |
| Bacteria.Proteobacteria.Betaproteobacteria.Burkholderiales.Comamonadaceae                                | Ismailia Control | 0.006324 |          |
| Bacteria.Proteobacteria.Betaproteobacteria.Burkholderiales.Comamonadaceae.s__                            | Ismailia Control | 0.006324 | 3.200659 |
| Bacteria.Proteobacteria.Gammaproteobacteria.Pseudomonadales.Pseudomonadaceae                             | Ismailia Control | 0.001627 | 4.015023 |
| Bacteria.Proteobacteria.Gammaproteobacteria.Pseudomonadales.Pseudomonadaceae.Pseudomonas                 | Ismailia Control | 0.001627 | 3.918113 |
| Bacteria.Proteobacteria.Gammaproteobacteria.Pseudomonadales                                              | Ismailia Control | 0.000162 | 4.39764  |
| Bacteria.Proteobacteria.Gammaproteobacteria.Pseudomonadales.Pseudomonadaceae.Pseudomonas.s__             | Ismailia Control | 0.006324 | 3.316053 |
| Bacteria.Proteobacteria.Gammaproteobacteria.Pseudomonadales.Pseudomonadaceae.Pseudomonas.s__alcaligenes  | Ismailia Control | 0.013021 | 3.617083 |
| Bacteria.Proteobacteria.Gammaproteobacteria.Pseudomonadales.Pseudomonadaceae.s__                         | Ismailia Control | 0.006324 | 3.316053 |
| Bacteria.Proteobacteria.Gammaproteobacteria.Pseudomonadales.Pseudomonadaceae                             | Ismailia Control | 0.006324 |          |
| Bacteria.Proteobacteria.Gammaproteobacteria.Pseudomonadales.Moraxellaceae                                | Ismailia Control | 0.006324 | 3.200659 |
| Bacteria.Proteobacteria.Gammaproteobacteria.Pseudomonadales.Moraxellaceae.Psychrobacter                  | Ismailia Control | 0.010503 | 3.563207 |
| Bacteria.Proteobacteria.Gammaproteobacteria.Pseudomonadales.Moraxellaceae.Acinetobacter.s__              | Ismailia Control | 0.006324 | 3.200659 |
| Bacteria.Proteobacteria.Gammaproteobacteria.Pseudomonadales.Moraxellaceae.Acinetobacter.s__johnsonii     | Ismailia Control | 0.006324 | 3.316053 |
| Bacteria.Proteobacteria.Gammaproteobacteria.Pseudomonadales.Moraxellaceae.Psychrobacter.s__marincola     | Ismailia Control | 0.006324 | 3.316053 |
| Bacteria.Proteobacteria.Gammaproteobacteria.Pseudomonadales.Moraxellaceae.s__                            | Ismailia Control | 0.006324 | 3.200659 |
| Bacteria.Proteobacteria.Gammaproteobacteria.Pseudomonadales.Moraxellaceae                                | Ismailia Control | 0.016256 | 4.165267 |
| Bacteria.Proteobacteria.Gammaproteobacteria.Alteromonadales.Shewanellaceae.Shewanella.s__                | Ismailia Control | 0.006324 |          |
| Bacteria.Proteobacteria.Gammaproteobacteria.Alteromonadales.Shewanellaceae.Shewanella                    | Ismailia Control | 0.006324 | 3.316053 |
| Bacteria.Proteobacteria.Gammaproteobacteria.Alteromonadales.Shewanellaceae                               | Ismailia Control | 0.006324 |          |
| Bacteria.Proteobacteria.Gammaproteobacteria.Alteromonadales                                              | Ismailia Control | 0.006324 | 3.316053 |
| Bacteria.Proteobacteria.Gammaproteobacteria.Aeromonadales.Aeromonadaceae                                 | Ismailia Control | 0.006324 | 3.802719 |
| Bacteria.Proteobacteria.Gammaproteobacteria.Aeromonadales.Aeromonadaceae                                 | Ismailia Control | 0.006324 | 3.802719 |
| Bacteria.Proteobacteria.Gammaproteobacteria.Pasteurellales.Pasteurellaceae.Haemophilus.s__parainfluenzae | Ismailia Control | 0.006324 | 3.316053 |
| Bacteria.Proteobacteria.Gammaproteobacteria.Pasteurellales.Pasteurellaceae.Haemophilus.s__               | Ismailia Control | 0.006324 | 3.501689 |
| Bacteria.Proteobacteria.Gammaproteobacteria.Pasteurellales.Pasteurellaceae.Haemophilus                   | Ismailia Control | 0.001288 | 3.719745 |
| Bacteria.Proteobacteria.Gammaproteobacteria.Pasteurellales.Pasteurellaceae.Aggregatibacter.s__           | Ismailia Control | 0.006324 | 3.200659 |

|                                                                                                 |                  |          |          |
|-------------------------------------------------------------------------------------------------|------------------|----------|----------|
| Archaea                                                                                         | Ismailia Control | 0.02266  | 3.789136 |
| Archaea.Euryarchaeota.Methanobacteria.Methanobacteriales                                        | Ismailia Control | 0.02266  | 3.789136 |
| Archaea.Euryarchaeota.Methanobacteria.Methanobacteriales.Methanobacteriaceae                    | Ismailia Control | 0.02266  | 3.789136 |
| Archaea.Euryarchaeota.Methanobacteria.Methanobacteriales.Methanobacteriaceae.Methanosphaera.s__ | Ismailia Control | 0.02266  | 3.789136 |
| Archaea.Euryarchaeota.Methanobacteria.Methanobacteriales.Methanobacteriaceae.Methanosphaera     | Ismailia Control | 0.02266  | 3.789136 |
| Archaea.Euryarchaeota.Methanobacteria                                                           | Ismailia Control | 0.02266  | 3.789136 |
| Bacteria.Bacteroidetes.Bacteroidia.Bacteroidales.Bacteroidaceae.Bacteroides                     | Ismailia Control | 0.03023  | 3.919019 |
| Bacteria.Bacteroidetes.Bacteroidia.Bacteroidales.Bacteroidaceae.Bacteroides.s__eggerthii        | Ismailia Control | 0.006324 | 3.793174 |
| Bacteria.Bacteroidetes.Bacteroidia.Bacteroidales.Bacteroidaceae                                 | Ismailia Control | 0.03023  | 3.919019 |
| Bacteria.Bacteroidetes.Bacteroidia.Bacteroidales                                                | Ismailia Control | 0.006324 | 2.842543 |
| Bacteria.Bacteroidetes.Bacteroidia.Bacteroidales.Rikenellaceae                                  | Ismailia Control | 0.023422 | 4.485751 |
| Bacteria.Bacteroidetes.Bacteroidia.Bacteroidales.Rikenellaceae                                  | Ismailia Control | 0.006324 | 4.444603 |
| Bacteria.Bacteroidetes.Bacteroidia.Bacteroidales.Rikenellaceae.s__                              | Ismailia Control | 0.006324 | 4.444603 |
| Bacteria.Bacteroidetes.Bacteroidia.Bacteroidales.Porphyromonadaceae.Porphyromonas               | Ismailia Control | 0.006324 | 3.143573 |
| Bacteria.Bacteroidetes.Bacteroidia.Bacteroidales.Porphyromonadaceae.Porphyromonas.s__           | Ismailia Control | 0.006324 | 3.143573 |
| Bacteria.Bacteroidetes.Bacteroidia.Bacteroidales._Barnesiellaceae_                              | Ismailia Control | 0.006324 | 3.316053 |
| Bacteria.Bacteroidetes.Bacteroidia.Bacteroidales._Barnesiellaceae.s__                           | Ismailia Control | 0.006324 | 3.316053 |
| Bacteria.Bacteroidetes.Bacteroidia.Bacteroidales._Paraprevotellaceae.s__                        | Ismailia Control | 0.006324 | 3.143573 |
| Bacteria.Bacteroidetes.Bacteroidia.Bacteroidales._Paraprevotellaceae._Prevotella.s__            | Ismailia Control | 0.006324 | 3.316053 |
| Bacteria.Bacteroidetes.Bacteroidia.Bacteroidales.Prevotellaceae.Prevotella.s__melaninogenica    | Ismailia Control | 0.006324 | 3.200659 |
| Bacteria.Bacteroidetes.Bacteroidia.Bacteroidales.Prevotellaceae.Prevotella.s__copri             | Ismailia Control | 0.006324 | 3.316053 |
| Bacteria.Bacteroidetes.Bacteroidia.Bacteroidales.Prevotellaceae                                 | Ismailia Control | 4.70E-06 | 3.703247 |
| Bacteria.Bacteroidetes.Bacteroidia.Bacteroidales.Prevotellaceae.Prevotella                      | Ismailia Control | 6.61E-06 | 3.703247 |
| Bacteria.Fusobacteria.Fusobacteriia.Fusobacteriales.Fusobacteriaceae.Fusobacterium.s__          | Ismailia Control | 0.006324 | 3.200659 |
| Bacteria.Fusobacteria.Fusobacteriia.Fusobacteriales.Fusobacteriaceae                            | Ismailia Control | 0.006324 | 3.200659 |
| Bacteria.Fusobacteria.Fusobacteriia.Fusobacteriales.Leptotrichiaceae                            | Ismailia Control | 0.000735 | 4.122422 |
| Bacteria.Fusobacteria.Fusobacteriia.Fusobacteriales.Leptotrichiaceae.s__                        | Ismailia Control | 0.000424 | 4.099003 |
| Bacteria.Fusobacteria.Fusobacteriia.Fusobacteriales.Leptotrichiaceae                            | Ismailia Control | 0.000424 | 4.099003 |
| Bacteria.Fusobacteria                                                                           | Ismailia Control | 0.000735 | 4.171539 |
| Bacteria.Fusobacteria.Fusobacteriia                                                             | Ismailia Control | 0.000735 | 4.171539 |
| Bacteria.Fusobacteria.Fusobacteriia.Fusobacteriales                                             | Ismailia Control | 0.000735 | 4.171539 |
| Bacteria.Fusobacteria.Fusobacteriia.Fusobacteriales.Fusobacteriaceae.Fusobacterium              | Ismailia Control | 0.006324 | 3.200659 |
| Bacteria.Spirochaetes.Spirochaetes.Spirochaetales.Spirochaetaceae.Treponema.s__amylovorum       | Ismailia Control | 0.006324 | 3.316053 |
| Bacteria.Spirochaetes                                                                           | Ismailia Control | 0.009648 | 3.563207 |
| Bacteria.Spirochaetes.Spirochaetes                                                              | Ismailia Control | 1.34E-05 | 3.563207 |
| Bacteria.Spirochaetes.Spirochaetes.Spirochaetales.Spirochaetaceae.Treponema                     | Ismailia Control | 1.34E-05 | 3.563207 |
| Bacteria.Spirochaetes.Spirochaetes.Spirochaetales.Spirochaetaceae.Treponema.s__                 | Ismailia Control | 0.006324 | 3.200659 |
| Bacteria.Spirochaetes.Spirochaetes.Spirochaetales                                               | Ismailia Control | 1.34E-05 | 3.563207 |
| Bacteria.Spirochaetes.Spirochaetes.Spirochaetales.Spirochaetaceae                               | Ismailia Control | 1.34E-05 | 3.563207 |
| Bacteria._Thermi_.Deinococci.Thermales.Thermaceae.Thermus                                       | Ismailia Control | 0.006324 | 3.316053 |
| Bacteria._Thermi_.Deinococci.Thermales.Thermaceae.Thermus.s__                                   | Ismailia Control | 0.006324 | 3.316053 |

|                                                                                                          |                  |          |          |
|----------------------------------------------------------------------------------------------------------|------------------|----------|----------|
| Bacteria.Tenericutes.Mollicutes.Mycoplasmatales.Mycoplasmataceae.Ureaplasma.s__                          | Ismailia Control | 0.0003   | 3.807804 |
| Bacteria.Tenericutes.Mollicutes.Mycoplasmatales.Mycoplasmataceae.Ureaplasma                              | Ismailia Control | 0.0003   | 3.807804 |
| Bacteria.Tenericutes.Mollicutes.Mycoplasmatales                                                          | Ismailia Control | 0.0003   | 3.807804 |
| Bacteria.Tenericutes.Mollicutes.Mycoplasmatales.Mycoplasmataceae                                         | Ismailia Control | 0.0003   | 3.807804 |
| Bacteria.Synergistetes.Synergistia.Synergistales                                                         | Ismailia Control | 0.009244 | 4.094008 |
| Bacteria.Synergistetes.Synergistia.Synergistales                                                         | Ismailia Control | 0.009244 | 4.094008 |
| Bacteria.Actinobacteria                                                                                  | Ismailia DM      | 0.042062 | 5.321039 |
| Bacteria.Actinobacteria.Coriobacteriia                                                                   | Ismailia DM      | 0.001721 | 5.218377 |
| Bacteria.Actinobacteria.Coriobacteriia.Coriobacteriales                                                  | Ismailia DM      | 0.001721 | 5.218377 |
| Bacteria.Actinobacteria.Coriobacteriia.Coriobacteriales.Coriobacteriaceae.Atopobium.s__vaginae           | Ismailia DM      | 7.59E-07 | 5.212229 |
| Bacteria.Actinobacteria.Coriobacteriia.Coriobacteriales.Coriobacteriaceae.Atopobium                      | Ismailia DM      | 7.61E-07 | 5.213945 |
| Bacteria.Actinobacteria.Coriobacteriia.Coriobacteriales.Coriobacteriaceae                                | Ismailia DM      | 0.001721 | 5.218377 |
| Bacteria.Actinobacteria.Actinobacteria.Actinomycetales.Micrococaceae.Rothia                              | Ismailia DM      | 0.018311 | 3.52236  |
| Bacteria.Actinobacteria.Actinobacteria.Bifidobacteriales.Bifidobacteriaceae.Gardnerella.s__              | Ismailia DM      | 1.05E-05 | 4.458402 |
| Bacteria.Actinobacteria.Actinobacteria.Bifidobacteriales.Bifidobacteriaceae.Gardnerella                  | Ismailia DM      | 1.05E-05 | 4.458402 |
| Bacteria.Proteobacteria.Alphaproteobacteria.Rickettsiales.mitochondria.Victoria.s__amazonica             | Ismailia DM      | 0.003466 | 4.131484 |
| Bacteria.Proteobacteria.Alphaproteobacteria.Rickettsiales.mitochondria                                   | Ismailia DM      | 0.000238 | 4.556193 |
| Bacteria.Proteobacteria.Alphaproteobacteria.Rickettsiales                                                | Ismailia DM      | 0.000238 | 4.556193 |
| Bacteria.Proteobacteria.Alphaproteobacteria.Rickettsiales.mitochondria.Victoria                          | Ismailia DM      | 0.003466 | 4.131484 |
| Bacteria.Proteobacteria.Alphaproteobacteria.Rhizobiales                                                  | Ismailia DM      | 0.042507 | 3.49132  |
| Bacteria.Proteobacteria.Alphaproteobacteria.Rhodobacterales                                              | Ismailia DM      | 8.10E-07 | 4.511143 |
| Bacteria.Proteobacteria.Alphaproteobacteria.Rhodobacterales.Rhodobacteraceae                             | Ismailia DM      | 8.10E-07 | 4.490297 |
| Bacteria.Proteobacteria.Alphaproteobacteria.Rhodobacterales.Rhodobacteraceae.Paracoccus.s__marcusii      | Ismailia DM      | 4.16E-07 | 4.442823 |
| Bacteria.Proteobacteria.Alphaproteobacteria.Rhodobacterales.Rhodobacteraceae.Paracoccus                  | Ismailia DM      | 8.10E-07 | 4.455576 |
| Bacteria.Proteobacteria.Betaproteobacteria                                                               | Ismailia DM      | 0.006502 | 4.143947 |
| Bacteria.Proteobacteria.Betaproteobacteria.Neisseriales.Neisseriaceae                                    | Ismailia DM      | 0.016511 | 3.55162  |
| Bacteria.Proteobacteria.Betaproteobacteria.Neisseriales                                                  | Ismailia DM      | 0.016511 | 3.55162  |
| Bacteria.Proteobacteria.Deltaproteobacteria.Desulfovibrionales.Desulfovibrionaceae.Desulfovibrio         | Ismailia DM      | 0.013202 | 4.031998 |
| Bacteria.Proteobacteria.Deltaproteobacteria.Desulfovibrionales.Desulfovibrionaceae.Desulfovibrio.s__     | Ismailia DM      | 0.009871 | 3.965862 |
| Bacteria.Proteobacteria.Gammaproteobacteria.Cardibacteriales.Cardibacteriaceae                           | Ismailia DM      | 0.001141 | 3.535291 |
| Bacteria.Proteobacteria.Gammaproteobacteria.Cardibacteriales.Cardibacteriaceae.Suttonella.s__indologenes | Ismailia DM      | 0.026349 | 3.38082  |
| Bacteria.Proteobacteria.Gammaproteobacteria.Cardibacteriales.Cardibacteriaceae.Suttonella                | Ismailia DM      | 0.026349 | 3.38082  |
| Bacteria.Proteobacteria.Gammaproteobacteria.Cardibacteriales                                             | Ismailia DM      | 0.001141 |          |
| Bacteria.Proteobacteria.Gammaproteobacteria.Pseudomonadales.Pseudomonadaceae.Pseudomonas.s__stutzeri     | Ismailia DM      | 0.018029 | 3.59513  |
| Bacteria.Firmicutes.Clostridia.Clostridiales.Lachnospiraceae.Lachnospira                                 | Ismailia DM      | 0.003466 | 4.124701 |
| Bacteria.Firmicutes.Clostridia.Clostridiales.Lachnospiraceae.Lachnospira                                 | Ismailia DM      | 0.003466 | 4.124701 |
| Bacteria.Firmicutes.Clostridia.Clostridiales.Lachnospiraceae.Butyrvibrio.s__                             | Ismailia DM      | 0.026349 | 3.28559  |
| Bacteria.Firmicutes.Clostridia.Clostridiales.Lachnospiraceae.Butyrvibrio                                 | Ismailia DM      | 0.026349 | 3.28559  |
| Bacteria.Firmicutes.Clostridia.Clostridiales.Lachnospiraceae.Epulopiscium.s__                            | Ismailia DM      | 0.023233 | 3.715939 |
| Bacteria.Firmicutes.Clostridia.Clostridiales.Lachnospiraceae.Epulopiscium                                | Ismailia DM      | 0.023233 | 3.715939 |
| Bacteria.Firmicutes.Clostridia.Clostridiales.Lachnospiraceae                                             | Ismailia DM      | 0.039446 | 3.421453 |

|                                                                                                                       |             |          |          |
|-----------------------------------------------------------------------------------------------------------------------|-------------|----------|----------|
| Bacteria.Firmicutes.Clostridia.Clostridiales.Clostridiaceae                                                           | Ismailia DM | 0.000249 | 3.981235 |
| Bacteria.Firmicutes.Clostridia.Clostridiales.Clostridiaceae.Clostridium.s__                                           | Ismailia DM | 0.002479 | 3.695572 |
| Bacteria.Firmicutes.Clostridia.Clostridiales.Clostridiaceae.Clostridium                                               | Ismailia DM | 0.000852 | 3.970341 |
| Bacteria.Firmicutes.Clostridia.Clostridiales.Clostridiaceae.Clostridium.s__intestinale                                | Ismailia DM | 0.026349 | 3.223223 |
| Bacteria.Firmicutes.Clostridia.Clostridiales.Peptostreptococcaceae.Clostridium                                        | Ismailia DM | 0.015261 | 3.572338 |
| Bacteria.Firmicutes.Bacilli.Lactobacillales.Aerococcaceae.Alloiococcus.s__otitis                                      | Ismailia DM | 0.026349 | 3.223223 |
| Bacteria.Firmicutes.Bacilli.Lactobacillales.Streptococcaceae.Lactococcus.s__                                          | Ismailia DM | 0.003466 | 4.170531 |
| Bacteria.Firmicutes.Bacilli.Lactobacillales.Carnobacteriaceae                                                         | Ismailia DM | 0.009871 | 3.362246 |
| Bacteria.Firmicutes.Bacilli.Turicibacterales.Turicibacteraceae                                                        | Ismailia DM | 0.026317 | 3.35635  |
| Bacteria.Firmicutes.Bacilli.Turicibacterales                                                                          | Ismailia DM | 0.026317 | 3.35635  |
| Bacteria.Firmicutes.Bacilli.Turicibacterales.Turicibacteraceae.Turicibacter.s__                                       | Ismailia DM | 0.026317 | 3.35635  |
| Bacteria.Firmicutes.Bacilli.Turicibacterales.Turicibacteraceae.Turicibacter                                           | Ismailia DM | 0.026317 | 3.35635  |
| Bacteria.Firmicutes.Clostridia.Clostridiales._Tissierellaceae_.Finegoldia.s__                                         | Ismailia DM | 0.009777 | 3.600415 |
| Bacteria.Firmicutes.Clostridia.Clostridiales._Tissierellaceae_.Finegoldia                                             | Ismailia DM | 0.009777 | 3.600415 |
| Bacteria.Firmicutes.Clostridia.Clostridiales.Veillonellaceae.Dialister                                                | Ismailia DM | 0.009871 | 3.297574 |
| Bacteria.Firmicutes.Clostridia.Clostridiales.Veillonellaceae.Dialister.s__                                            | Ismailia DM | 0.009871 |          |
| Bacteria.Bacteroidetes._Saprosirae_                                                                                   | Ismailia DM | 0.006293 | 3.795629 |
| Bacteria.Bacteroidetes._Saprosirae_._Saprosirales_                                                                    | Ismailia DM | 0.006293 | 3.795629 |
| Bacteria.Bacteroidetes._Saprosirae_._Saprosirales_._Saprosiraceae                                                     | Ismailia DM | 0.006293 | 3.669237 |
| Bacteria.Bacteroidetes._Saprosirae_._Saprosirales_._Saprosiraceae.Aquirestis                                          | Ismailia DM | 0.006293 | 3.498115 |
| Bacteria.Bacteroidetes._Saprosirae_._Saprosirales_._Saprosiraceae.Aquirestis.s__calciphila                            | Ismailia DM | 0.006293 | 3.498115 |
| Bacteria.Bacteroidetes.Flavobacteriia.Flavobacteriales.Flavobacteriaceae                                              | Ismailia DM | 0.015975 | 3.437002 |
| Bacteria.Bacteroidetes.Flavobacteriia.Flavobacteriales                                                                | Ismailia DM | 0.015975 | 3.634732 |
| Bacteria.Bacteroidetes.Flavobacteriia                                                                                 | Ismailia DM | 0.015975 | 3.634732 |
| Bacteria.Bacteroidetes.Cytophagia.Cytophagales.Cytophagaceae.Runella.s__                                              | Ismailia DM | 0.026317 | 3.483034 |
| Bacteria.Bacteroidetes.Cytophagia.Cytophagales.Cytophagaceae.Runella                                                  | Ismailia DM | 0.026317 | 3.483034 |
| Bacteria.Bacteroidetes.Cytophagia.Cytophagales.Cyclobacteriaceae.s__                                                  | Ismailia DM | 0.026317 | 3.483034 |
| Bacteria.Bacteroidetes.Cytophagia.Cytophagales.Cyclobacteriaceae                                                      | Ismailia DM | 0.026317 | 3.483034 |
| Bacteria.Bacteroidetes.Cytophagia.Cytophagales.Cyclobacteriaceae                                                      | Ismailia DM | 0.026317 | 3.483034 |
| Bacteria.Fusobacteria.Fusobacteriia.Fusobacteriales.Leptotrichiaceae.Sneathia.s__                                     | Ismailia DM | 0.006286 | 3.583886 |
| Bacteria.Fusobacteria.Fusobacteriia.Fusobacteriales.Leptotrichiaceae.Sneathia                                         | Ismailia DM | 0.006286 | 3.583886 |
| Bacteria.Verrucomicrobia._Spartobacteria_._Chthoniobacteriales_._Chthoniobacteraceae_.CandidatusXiphinematobacter.s__ | Ismailia DM | 0.009871 | 3.505864 |
| Bacteria.Verrucomicrobia._Spartobacteria_._Chthoniobacteriales_._Chthoniobacteraceae_.CandidatusXiphinematobacter     | Ismailia DM | 0.009871 | 3.505864 |
| Bacteria.Verrucomicrobia._Spartobacteria_                                                                             | Ismailia DM | 0.009871 | 3.505864 |
| Bacteria.Verrucomicrobia._Spartobacteria_._Chthoniobacteriales_._Chthoniobacteraceae_                                 | Ismailia DM | 0.009871 | 3.505864 |
| Bacteria.Verrucomicrobia._Spartobacteria_._Chthoniobacteriales_                                                       | Ismailia DM | 0.009871 | 3.505864 |

**Table S2: Core gut microbiome among the studied groups**

| <b>Ismailia control (IsC)</b> | <b>Ismailia diabetes (IsDM)</b> | <b>Assiut control (AsC)</b> | <b>Assiut diabetes (AsDM)</b> |
|-------------------------------|---------------------------------|-----------------------------|-------------------------------|
| Akkermansia                   | Bacteroides                     | Anaerovibrio                | Akkermansia                   |
| Bacteroides                   | Bifidobacterium                 | Bacteroides                 | Bacteroides                   |
| Bifidobacterium               | Blautia                         | Bifidobacterium             | Bifidobacterium               |
| Blautia                       | Dialister                       | Blautia                     | Blautia                       |
| Catenibacterium               | Faecalibacterium                | Catenibacterium             | Catenibacterium               |
| Collinsella                   | Lachnospira                     | Collinsella                 | Collinsella                   |
| Coprococcus                   | Lactobacillus                   | Coprococcus                 | Coprococcus                   |
| Dialister                     | Megasphaera                     | Dialister                   | Dialister                     |
| Eubacterium                   | Prevotella                      | Eubacterium                 | Eubacterium                   |
| Faecalibacterium              | Roseburia                       | Faecalibacterium            | Faecalibacterium              |
| Haemophilus                   | Ruminococcus                    | Lachnospira                 | Lachnospira                   |
| Lachnospira                   | Succinivibrio                   | Megasphaera                 | Lactobacillus                 |
| Lactobacillus                 | Sutterella                      | Mitsuokella                 | Megasphaera                   |
| Megasphaera                   | Prevotella                      | Mitsuokella                 |                               |
| Mitsuokella                   | Roseburia                       | Parabacteroides             |                               |
| Parabacteroides               | Ruminococcus                    | Phascolarctobacterium       |                               |
| Phascolarctobacterium         | Streptococcus                   | Prevotella                  |                               |
| Prevotella                    | Succinivibrio                   | Roseburia                   |                               |
| Roseburia                     | Sutterella                      | Ruminococcus                |                               |
| Ruminococcus                  | Treponema                       | SMB53                       |                               |
| SMB53                         |                                 | Succinivibrio               |                               |
| Streptococcus                 |                                 | Sutterella                  |                               |
| Succinivibrio                 |                                 | Treponema                   |                               |
| Sutterella                    |                                 |                             |                               |

**Table S3: Characteristic enterotype of each sample**

| Sample ID | Enterotype |
|-----------|------------|
| AsC1      | E1         |
| AsC2      | E1         |
| AsC3      | E1         |
| AsC4      | E1         |
| AsC5      | E1         |
| AsC6      | E1         |
| AsC7      | E1         |
| AsC8      | E1         |
| AsD1      | E5         |
| AsD2      | E5         |
| AsD3      | E5         |
| AsD4      | E5         |
| AsD5      | E5         |
| AsD6      | E5         |
| AsD7      | E5         |
| AsD8      | E5         |
| AsD9      | E5         |
| AsD10     | E5         |
| AsD11     | E5         |
| AsD12     | E5         |
| AsD13     | E5         |
| AsD14     | E4         |
| AsD15     | E4         |
| AsD16     | E4         |
| AsD17     | E4         |
| IsC1      | E3         |
| IsC2      | E3         |
| IsC3      | E3         |
| IsC4      | E3         |
| IsC5      | E3         |
| IsC6      | E3         |
| IsC7      | E3         |
| IsC8      | E3         |
| IsD1      | E2         |
| IsD2      | E2         |
| IsD3      | E2         |
| IsD4      | E2         |
| IsD5      | E2         |
| IsD6      | E2         |
| IsD7      | E2         |
| IsD8      | E2         |
| IsD9      | E2         |
| IsD10     | E2         |
| IsD11     | E2         |
| IsD12     | E2         |
| IsD13     | E2         |
| IsD14     | E2         |
| IsD15     | E2         |



**Table S4: Bacterial communities' characteristic enterotypes**

| Enterotype 1<br>(AsC) | Enterotype 2<br>(IsDM) | Enterotype 3<br>(IsC) | Enterotype4<br>(AsDM with giardia) | Enterotype5<br>(AsDM) |
|-----------------------|------------------------|-----------------------|------------------------------------|-----------------------|
| Prevotella            | Faecalibacterium       | Prevotella            | Bacteroides                        | Prevotella            |
| Succinivibrio         | Prevotella             | Faecalibacterium      | Dialister                          | Faecalibacterium      |
| Faecalibacterium      | Bacteroides            | Succinivibrio         | Lachnospira                        | Succinivibrio         |
| Bacteroides           | Lachnospira            | Dialister             | Bifidobacterium                    | Bifidobacterium       |
| Dialister             | Roseburia              | Lachnospira           | Blautia                            | Lactobacillus         |
| Lachnospira           | Blautia                | Bacteroides           | Roseburia                          | Bacteroides           |
| Ruminococcus          | Lactobacillus          | Ruminococcus          | Coprococcus                        | Dialister             |
| Bifidobacterium       | Sutterella             | Megasphaera           | Eubacterium                        | Collinsella           |
| Sutterella            | Dialister              | Phascolarctobacterium | Sutterella                         | Blautia               |
| Streptococcus         | Bifidobacterium        | Roseburia             | Megasphaera                        | Roseburia             |
| Eubacterium           | Coprococcus            | Blautia               | Megasphaera                        | Coprococcus           |
| Blautia               | Ruminococcus           | Oscillospira          |                                    | Lachnospira           |
| Coprococcus           | Streptococcus          | Lactobacillus         |                                    | Ruminococcus          |
| Roseburia             | Succinivibrio          | Coprococcus           |                                    | Catenibacterium       |
| Catenibacterium       | Anaerostipes           | Catenibacterium       |                                    | Eubacterium           |
| Collinsella           | Megasphaera            | Haemophilus           |                                    | Sutterella            |
| Phascolarctobacterium | Parabacteroides        | Clostridium           |                                    | Megasphaera           |
| Mitsuokella           |                        | Dorea                 |                                    |                       |
|                       |                        | Bifidobacterium       |                                    |                       |
